# Supplementary material for: Linear response properties of solvated systems: a computational study
Source: Royal Society of Chemistry journal article supplement (doi:10.1039/d2cp04512e), 2022-01-01
Supplement: d2cp04512e1.pdf [file d2cp04512e1.pdf]

# Electronic Supplementary Information: "Linear Response Properties of Solvated Systems: A Computational Study"

Linda Goletto<sup>†,‡</sup>, Sara Gómez,<sup>‡</sup> Josefine H. Andersen,<sup>¶</sup> Henrik Koch,<sup>\*,†,‡</sup> and Tommaso Giovannini<sup>\*,‡</sup>

<sup>†</sup>*Department of Chemistry, Norwegian University of Science and Technology, 7491 Trondheim, Norway*

<sup>‡</sup>*Scuola Normale Superiore, Piazza dei Cavalieri 7, 56126 Pisa, Italy*

<sup>¶</sup>*DTU Chemistry—Department of Chemistry, Technical University of Denmark, DK-2800 Kongens Lyngby, Denmark*

E-mail: henrik.koch@sns.it; tommaso.giovannini@sns.it

<sup>†</sup> Present address: *Scuola Normale Superiore, Piazza dei Cavalieri 7, I-56126 Pisa, Italy*

### Dipole moments

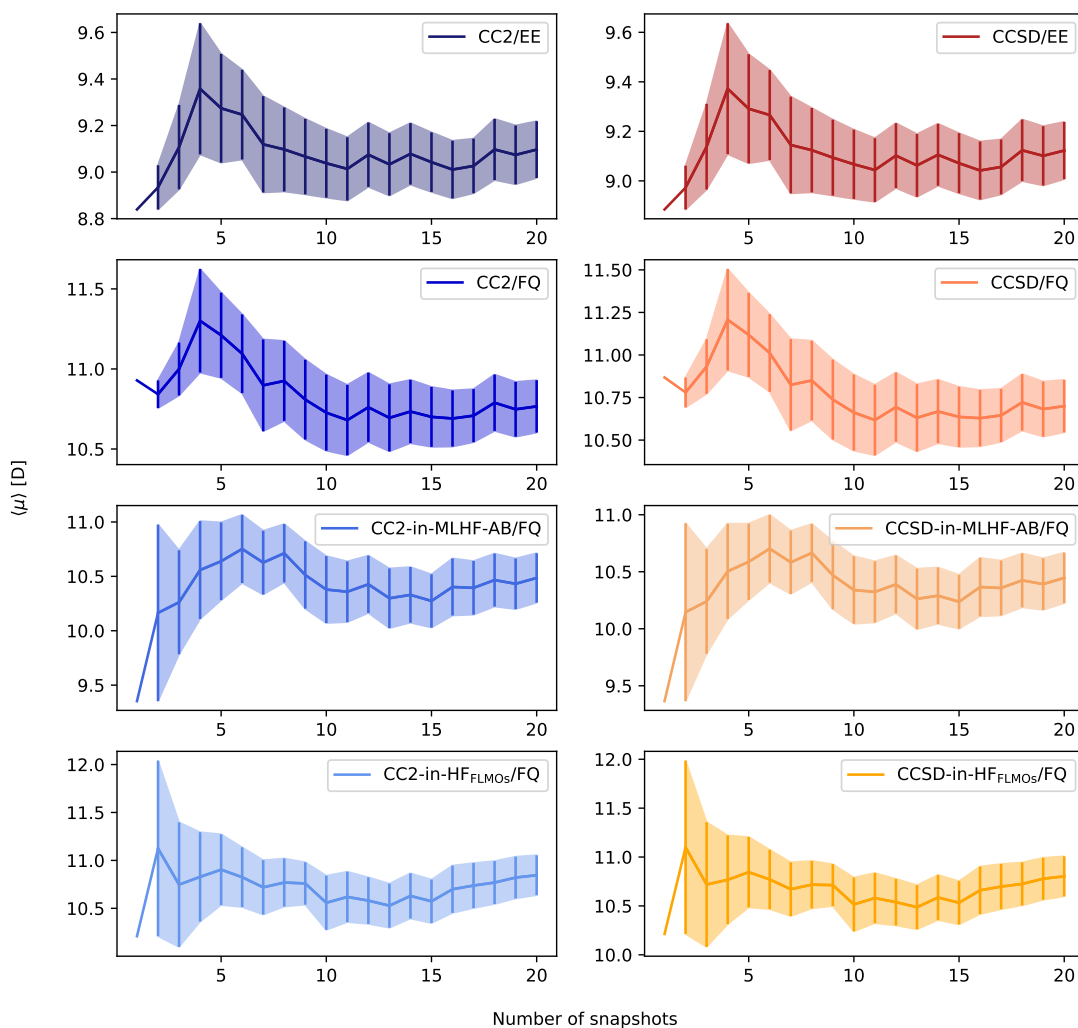

Figure S1: Dipole moment cumulative average of PNA-in-DIO as a function of the number of snapshots. Cumulative standard error bars at the 68% confidence interval are also plotted.

### Static polarizabilities

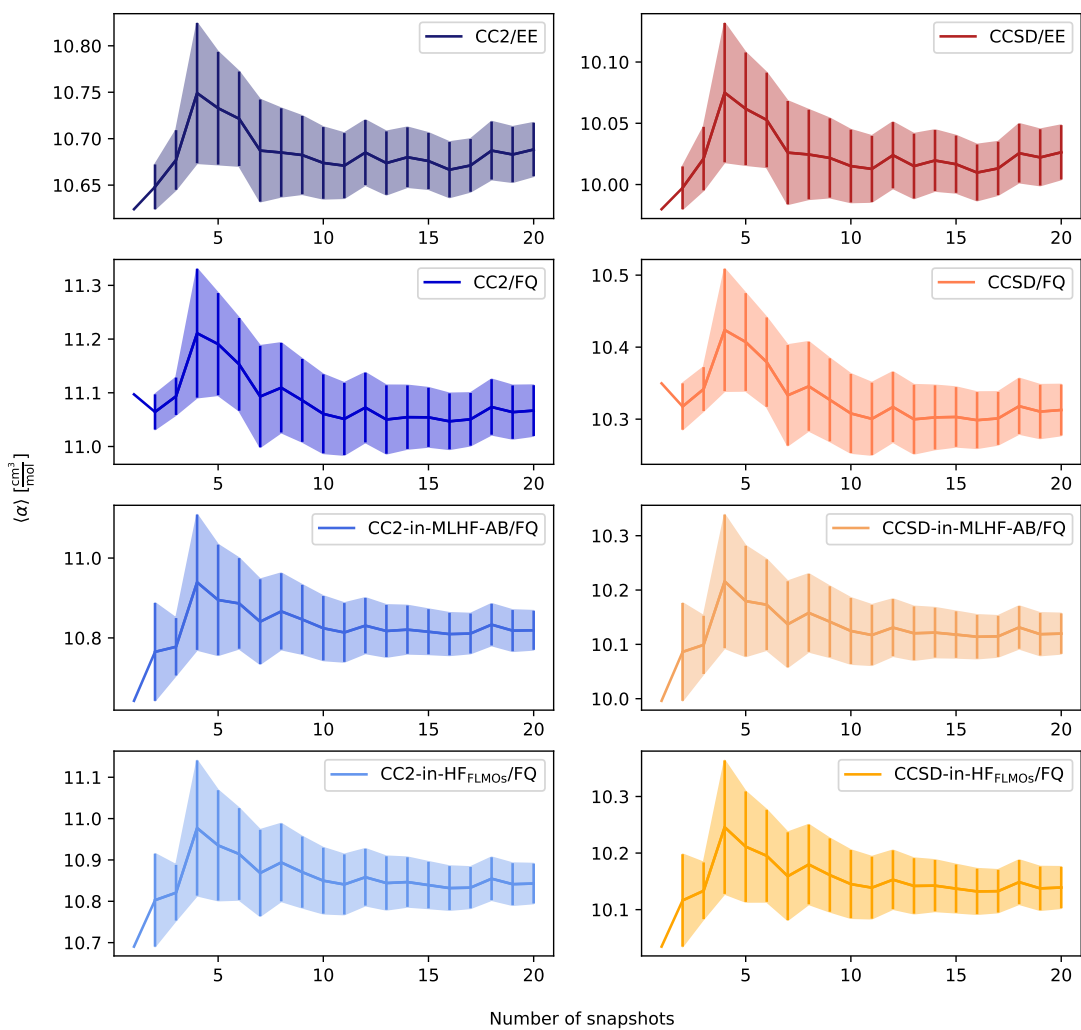

Figure S2: Static electronic polarizability cumulative average of PNA-in-DIO as a function of the number of snapshots. Cumulative standard error bars at the 68% confidence interval are also plotted.

### Dynamic polarizabilities

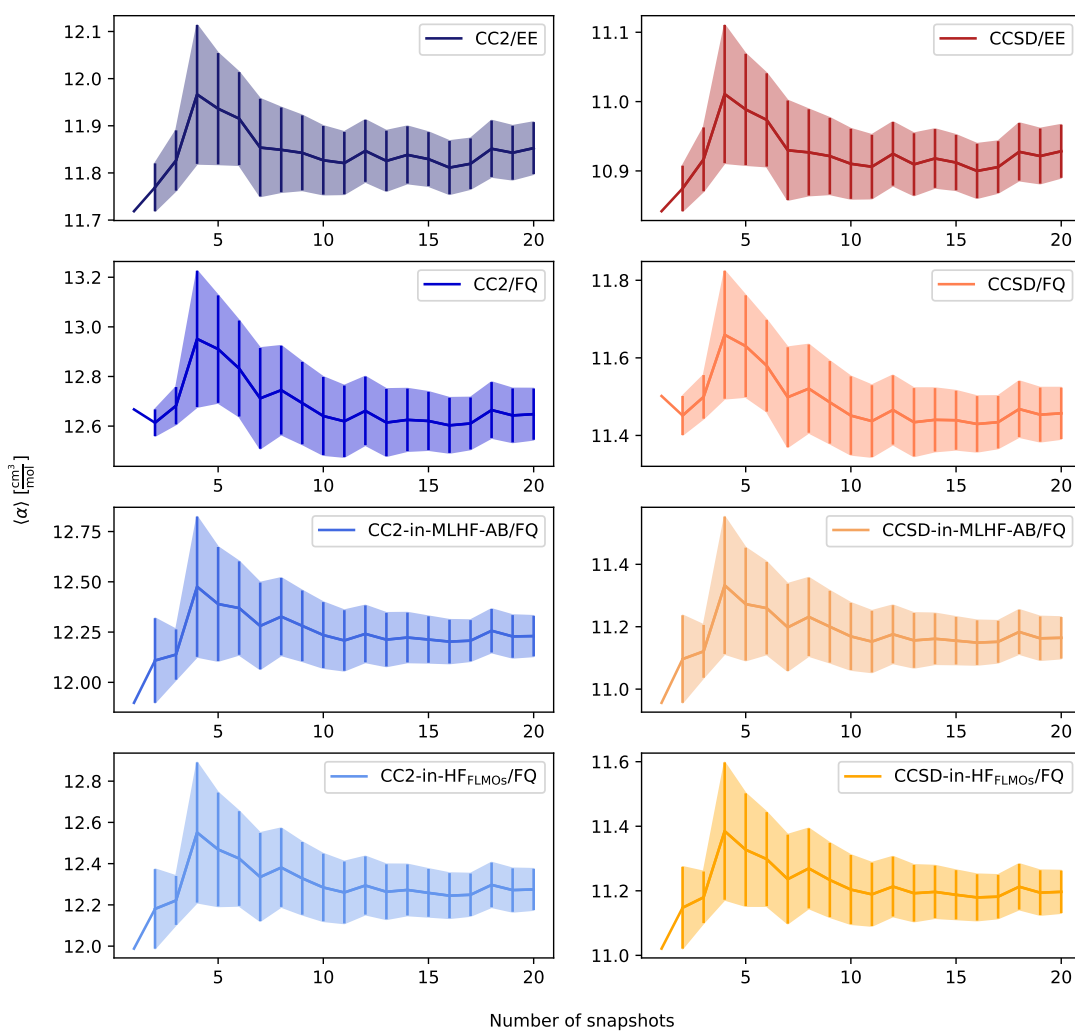

Figure S3: Dynamic electronic polarizability (589 nm) cumulative average for the dynamic electronic of PNA-in-DIO as a function of the number of snapshots. Cumulative standard error bars at the 68% confidence interval are also plotted.

Table S1: Calculated linear polarizabilities at different wavelengths  $\lambda$  of PhCN-in-ACN. The experimental values are reproduced from Ref. 1 ( $1 \frac{\text{cm}^3}{\text{mol}} = 1 N_A \cdot \text{esu}$ , where  $N_A$  is the Avogadro constant). <sup>a</sup> employ the Lorentz local field correction, <sup>b</sup> employ the Onsager local field correction.

| $\nu[\mu\text{m}^{-1}]$ | Method              | $\alpha^{\text{iso}} [\frac{\text{cm}^3}{\text{mol}}]$ | Method               | $\alpha^{\text{iso}} [\frac{\text{cm}^3}{\text{mol}}]$ | $\alpha^{\text{exp}} [\frac{\text{cm}^3}{\text{mol}}]$ |
|-------------------------|---------------------|--------------------------------------------------------|----------------------|--------------------------------------------------------|--------------------------------------------------------|
| 0.000                   | CC2 <i>in vacuo</i> | 8.163                                                  | CCSD <i>in vacuo</i> | 7.832                                                  |                                                        |
|                         | CC2/EE              | $8.201 \pm 0.005$                                      | CCSD/EE              | $7.874 \pm 0.005$                                      | $7.407^a$                                              |
|                         | CC2/FQ              | $8.198 \pm 0.008$                                      | CCSD/FQ              | $7.874 \pm 0.007$                                      | $7.347^b$                                              |
|                         | CC2-in-MLHF-AB/FQ   | $7.955 \pm 0.009$                                      | CCSD-in-MLHF-AB/FQ   | $7.647 \pm 0.008$                                      |                                                        |
| 1.553                   | CC2 <i>in vacuo</i> | 8.465                                                  | CCSD <i>in vacuo</i> | 8.102                                                  |                                                        |
|                         | CC2/EE              | $8.511 \pm 0.006$                                      | CCSD/EE              | $8.152 \pm 0.005$                                      | $7.757^a$                                              |
|                         | CC2/FQ              | $8.508 \pm 0.009$                                      | CCSD/FQ              | $8.152 \pm 0.008$                                      | $7.678^b$                                              |
|                         | CC2-in-MLHF-AB/FQ   | $8.237 \pm 0.010$                                      | CCSD-in-MLHF-AB/FQ   | $7.900 \pm 0.009$                                      |                                                        |
| 1.696                   | CC2 <i>in vacuo</i> | 8.528                                                  | CCSD <i>in vacuo</i> | 8.158                                                  |                                                        |
|                         | CC2/EE              | $8.576 \pm 0.006$                                      | CCSD/EE              | $8.210 \pm 0.006$                                      | $7.829^a$                                              |
|                         | CC2/FQ              | $8.573 \pm 0.009$                                      | CCSD/FQ              | $8.210 \pm 0.008$                                      | $7.750^b$                                              |
|                         | CC2-in-MLHF-AB/FQ   | $8.295 \pm 0.010$                                      | CCSD-in-MLHF-AB/FQ   | $7.952 \pm 0.009$                                      |                                                        |
| 1.831                   | CC2 <i>in vacuo</i> | 8.594                                                  | CCSD <i>in vacuo</i> | 8.216                                                  |                                                        |
|                         | CC2/EE              | $8.643 \pm 0.006$                                      | CCSD/EE              | $8.270 \pm 0.006$                                      | $7.895^a$                                              |
|                         | CC2/FQ              | $8.640 \pm 0.009$                                      | CCSD/FQ              | $8.270 \pm 0.008$                                      | $7.811^b$                                              |
|                         | CC2-in-MLHF-AB/FQ   | $8.357 \pm 0.010$                                      | CCSD-in-MLHF-AB/FQ   | $8.007 \pm 0.009$                                      |                                                        |
| 1.966                   | CC2 <i>in vacuo</i> | 8.668                                                  | CCSD <i>in vacuo</i> | 8.282                                                  |                                                        |
|                         | CC2/EE              | $8.719 \pm 0.006$                                      | CCSD/EE              | $8.338 \pm 0.006$                                      | $7.979^a$                                              |
|                         | CC2/FQ              | $8.717 \pm 0.009$                                      | CCSD/FQ              | $8.338 \pm 0.009$                                      | $7.895^b$                                              |
|                         | CC2-in-MLHF-AB/FQ   | $8.426 \pm 0.010$                                      | CCSD-in-MLHF-AB/FQ   | $8.068 \pm 0.010$                                      |                                                        |
| 2.295                   | CC2 <i>in vacuo</i> | 8.882                                                  | CCSD <i>in vacuo</i> | 8.471                                                  |                                                        |
|                         | CC2/EE              | $8.939 \pm 0.007$                                      | CCSD/EE              | $8.533 \pm 0.006$                                      | $8.172^a$                                              |
|                         | CC2/FQ              | $8.937 \pm 0.010$                                      | CCSD/FQ              | $8.534 \pm 0.009$                                      | $8.076^b$                                              |
|                         | CC2-in-MLHF-AB/FQ   | $8.624 \pm 0.011$                                      | CCSD-in-MLHF-AB/FQ   | $8.244 \pm 0.010$                                      |                                                        |

Table S2: Calculated linear polarizabilities at different wavelengths  $\lambda$  of PhCN-in-THF. The experimental values are reproduced from Ref. 1 ( $1 \frac{\text{cm}^3}{\text{mol}} = 1 N_A \cdot \text{esu}$ , where  $N_A$  is the Avogadro constant). <sup>a</sup> employ the Lorentz local field correction, <sup>b</sup> employ the Onsager local field correction.

| $\nu[\mu\text{m}^{-1}]$ | Method              | $\alpha^{\text{iso}}[\frac{\text{cm}^3}{\text{mol}}]$ | Method               | $\alpha^{\text{iso}}[\frac{\text{cm}^3}{\text{mol}}]$ | $\alpha^{\text{exp}}[\frac{\text{cm}^3}{\text{mol}}]$ |
|-------------------------|---------------------|-------------------------------------------------------|----------------------|-------------------------------------------------------|-------------------------------------------------------|
| 0.000                   | CC2 <i>in vacuo</i> | 8.163                                                 | CCSD <i>in vacuo</i> | 7.832                                                 |                                                       |
|                         | CC2/EE              | $8.190 \pm 0.005$                                     | CCSD/EE              | $7.862 \pm 0.004$                                     | $7.540^a$                                             |
|                         | CC2/FQ              | $8.143 \pm 0.007$                                     | CCSD/FQ              | $7.822 \pm 0.006$                                     | $7.486^b$                                             |
|                         | CC2-in-MLHF-AB/FQ   | $8.023 \pm 0.012$                                     | CCSD-in-MLHF-AB/FQ   | $7.711 \pm 0.011$                                     |                                                       |
| 1.553                   | CC2 <i>in vacuo</i> | 8.465                                                 | CCSD <i>in vacuo</i> | 8.102                                                 |                                                       |
|                         | CC2/EE              | $8.499 \pm 0.005$                                     | CCSD/EE              | $8.139 \pm 0.005$                                     | $7.708^a$                                             |
|                         | CC2/FQ              | $8.445 \pm 0.008$                                     | CCSD/FQ              | $8.095 \pm 0.007$                                     | $7.702^b$                                             |
|                         | CC2-in-MLHF-AB/FQ   | $8.312 \pm 0.014$                                     | CCSD-in-MLHF-AB/FQ   | $7.971 \pm 0.012$                                     |                                                       |
| 1.696                   | CC2 <i>in vacuo</i> | 8.528                                                 | CCSD <i>in vacuo</i> | 8.158                                                 |                                                       |
|                         | CC2/EE              | $8.563 \pm 0.005$                                     | CCSD/EE              | $8.197 \pm 0.005$                                     | $7.744^a$                                             |
|                         | CC2/FQ              | $8.508 \pm 0.008$                                     | CCSD/FQ              | $8.151 \pm 0.007$                                     | $7.738^b$                                             |
|                         | CC2-in-MLHF-AB/FQ   | $8.372 \pm 0.014$                                     | CCSD-in-MLHF-AB/FQ   | $8.024 \pm 0.013$                                     |                                                       |
| 1.831                   | CC2 <i>in vacuo</i> | 8.594                                                 | CCSD <i>in vacuo</i> | 8.216                                                 |                                                       |
|                         | CC2/EE              | $8.631 \pm 0.006$                                     | CCSD/EE              | $8.257 \pm 0.005$                                     | $7.811^a$                                             |
|                         | CC2/FQ              | $8.574 \pm 0.008$                                     | CCSD/FQ              | $8.210 \pm 0.007$                                     | $7.799^b$                                             |
|                         | CC2-in-MLHF-AB/FQ   | $8.435 \pm 0.014$                                     | CCSD-in-MLHF-AB/FQ   | $8.080 \pm 0.013$                                     |                                                       |
| 1.966                   | CC2 <i>in vacuo</i> | 8.668                                                 | CCSD <i>in vacuo</i> | 8.282                                                 |                                                       |
|                         | CC2/EE              | $8.707 \pm 0.006$                                     | CCSD/EE              | $8.324 \pm 0.005$                                     | $7.865^a$                                             |
|                         | CC2/FQ              | $8.649 \pm 0.008$                                     | CCSD/FQ              | $8.276 \pm 0.007$                                     | $7.853^b$                                             |
|                         | CC2-in-MLHF-AB/FQ   | $8.506 \pm 0.015$                                     | CCSD-in-MLHF-AB/FQ   | $8.144 \pm 0.013$                                     |                                                       |
| 2.295                   | CC2 <i>in vacuo</i> | 8.882                                                 | CCSD <i>in vacuo</i> | 8.471                                                 |                                                       |
|                         | CC2/EE              | $8.926 \pm 0.006$                                     | CCSD/EE              | $8.519 \pm 0.005$                                     | $8.064^a$                                             |
|                         | CC2/FQ              | $8.863 \pm 0.009$                                     | CCSD/FQ              | $8.467 \pm 0.008$                                     | $8.046^b$                                             |
|                         | CC2-in-MLHF-AB/FQ   | $8.711 \pm 0.016$                                     | CCSD-in-MLHF-AB/FQ   | $8.325 \pm 0.014$                                     |                                                       |

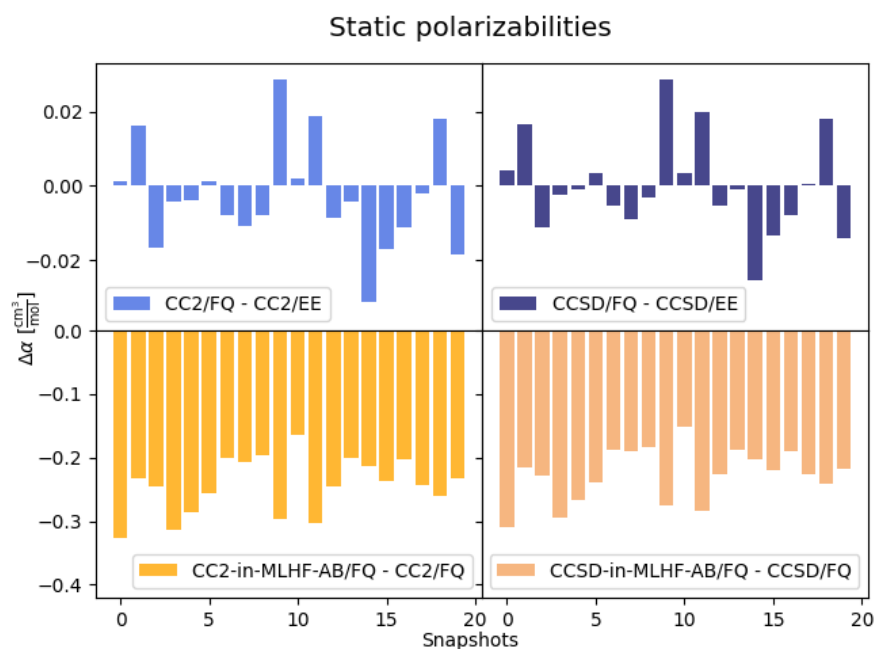

Figure S4: PhCN-in-ACN snapshot-to-snapshot differences between CC-in-MLHF-AB/FQ, CC/FQ, and CC/EE results for the electronic static polarizability.

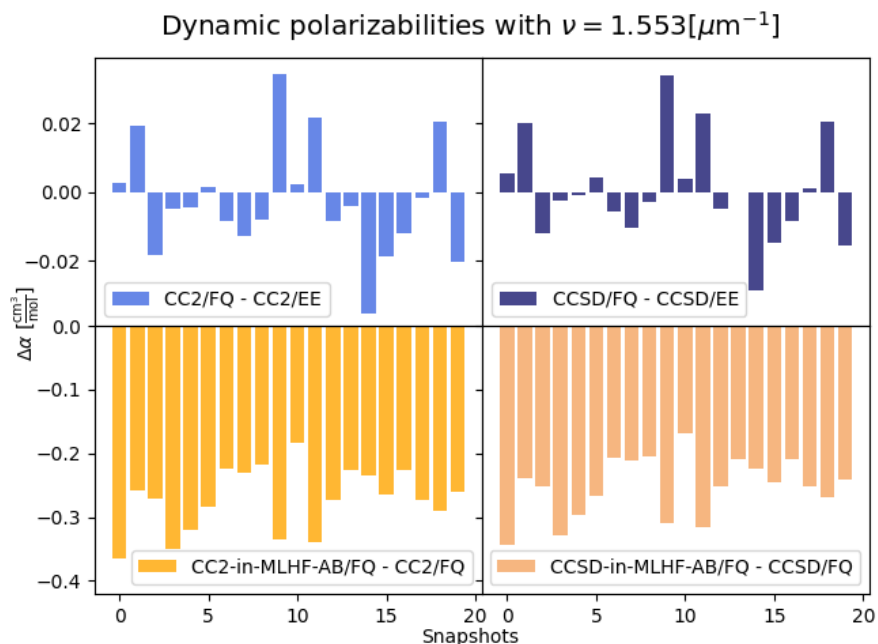

Figure S5: PhCN-in-ACN snapshot-to-snapshot differences between CC-in-MLHF-AB/FQ, CC/FQ, and CC/EE results for the electronic dynamic polarizability, with a frequency of  $1.553 \mu\text{m}^{-1}$ .

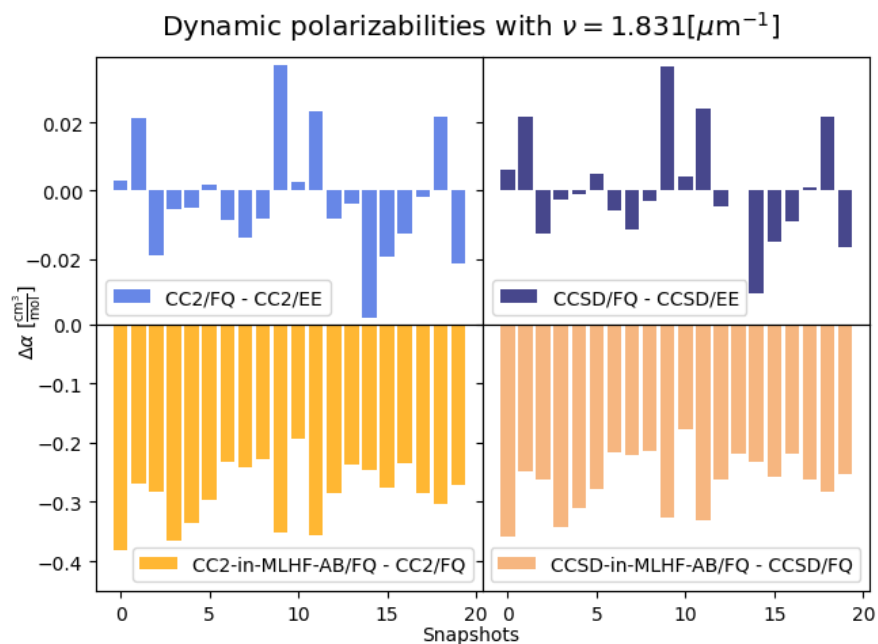

Figure S6: PhCN-in-ACN snapshot-to-snapshot differences between CC-in-MLHF-AB/FQ, CC/FQ, and CC/EE results for the electronic dynamic polarizability, with a frequency of  $1.831 \mu\text{m}^{-1}$ .

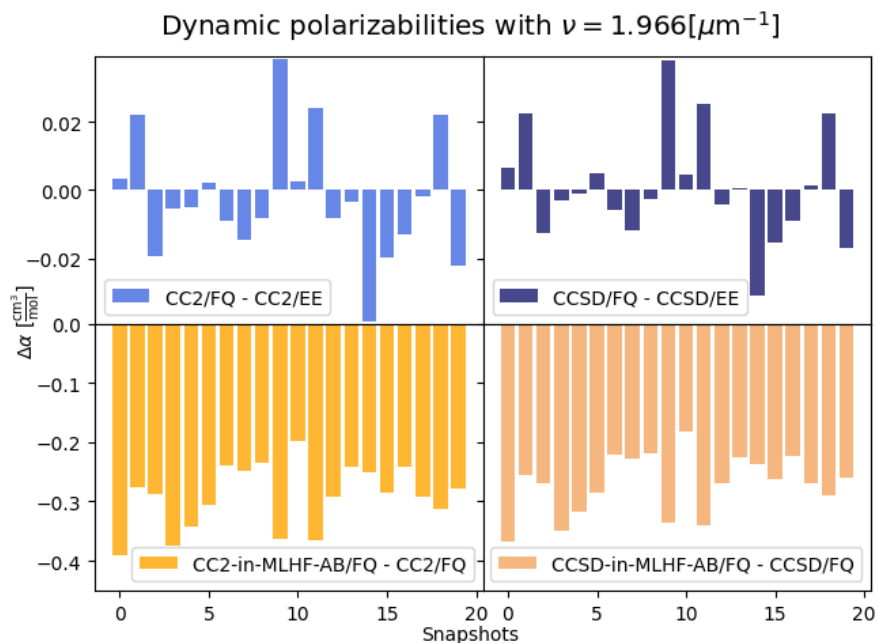

Figure S7: PhCN-in-ACN snapshot-to-snapshot differences between CC-in-MLHF-AB/FQ, CC/FQ, and CC/EE results for the electronic dynamic polarizability, with a frequency of  $1.966 \mu\text{m}^{-1}$ .



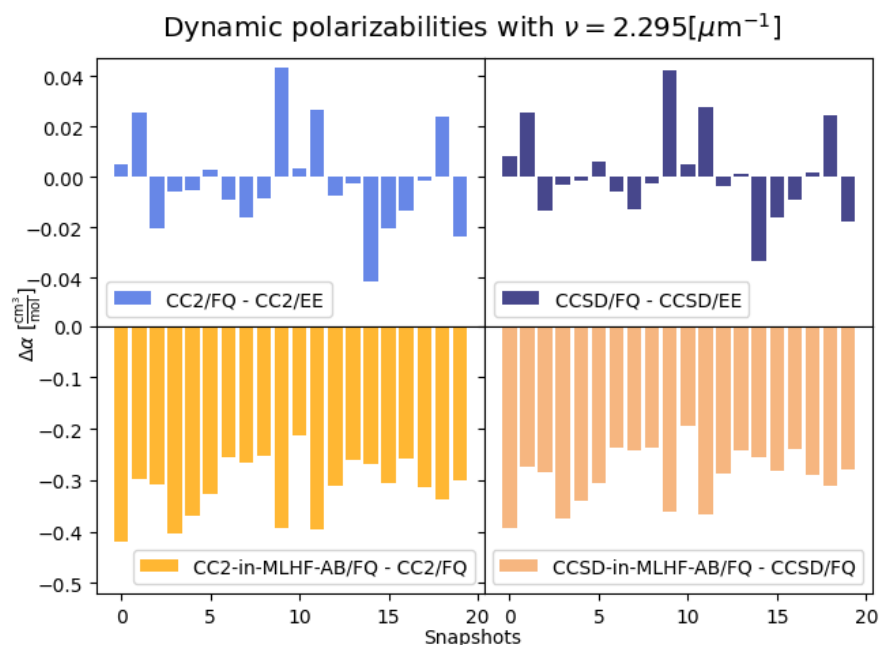

Figure S8: PhCN-in-ACN snapshot-to-snapshot differences between CC-in-MLHF-AB/FQ, CC/FQ, and CC/EE results for the electronic dynamic polarizability, with a frequency of  $2.295\mu\text{m}^{-1}$ .

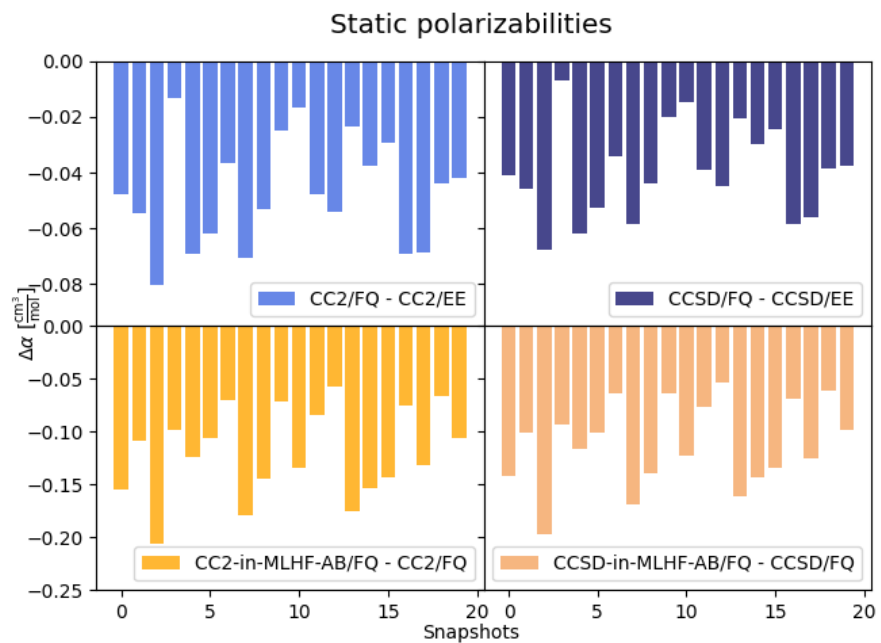

Figure S9: PhCN-in-THF snapshot-to-snapshot differences between CC-in-MLHF-AB/FQ, CC/FQ, and CC/EE results for the electronic static polarizability.

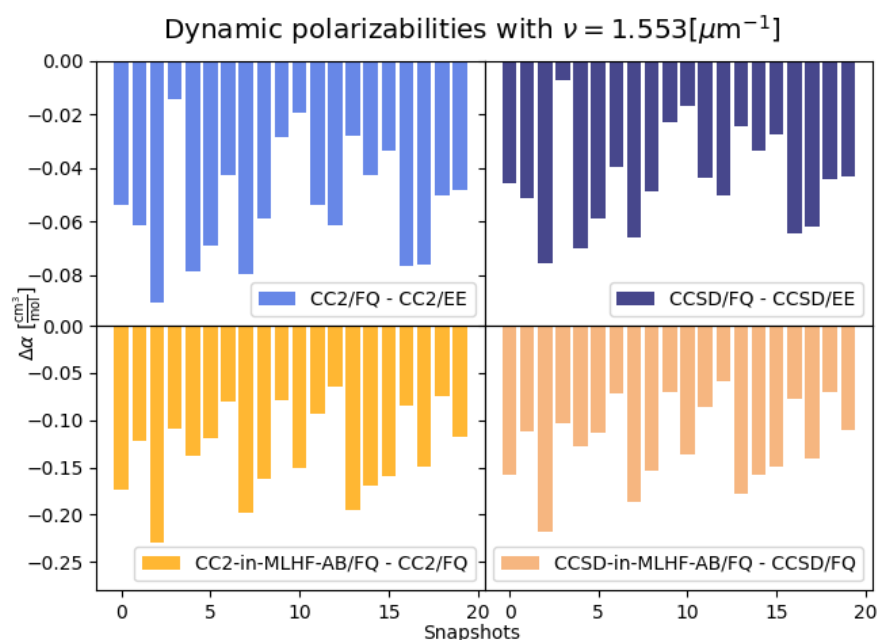

Figure S10: PhCN-in-THF snapshot-to-snapshot differences between CC-in-MLHF-AB/FQ, CC/FQ, and CC/EE results for the electronic dynamic polarizability, with a frequency of  $1.553 \mu\text{m}^{-1}$ .

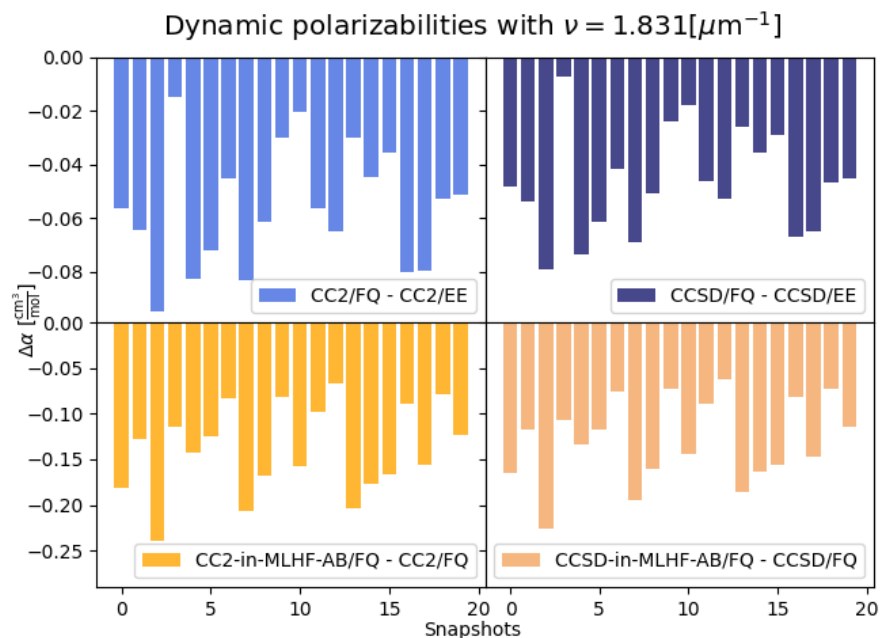

Figure S11: PhCN-in-THF snapshot-to-snapshot differences between CC-in-MLHF-AB/FQ, CC/FQ, and CC/EE results for the electronic dynamic polarizability, with a frequency of  $1.831 \mu\text{m}^{-1}$ .

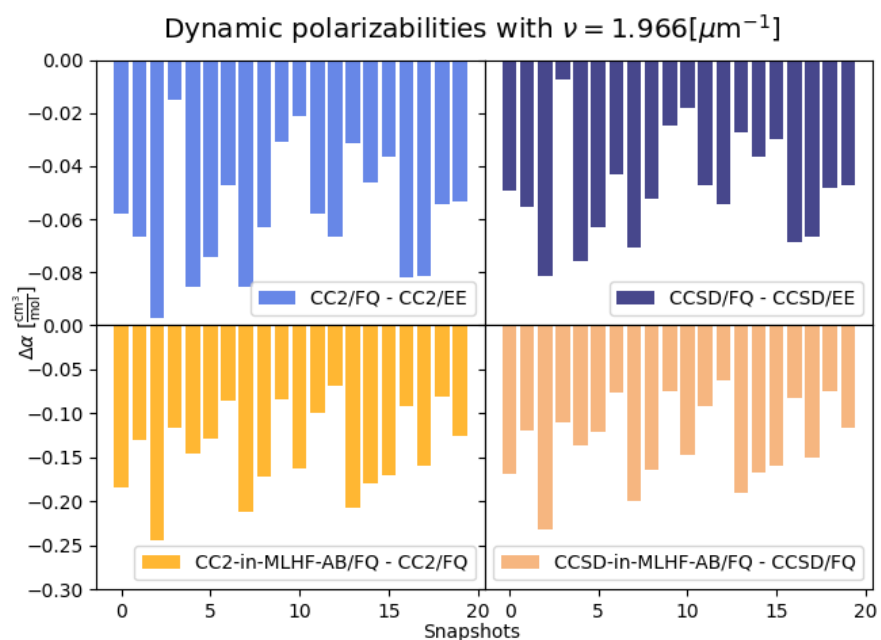

Figure S12: PhCN-in-THF snapshot-to-snapshot differences between CC-in-MLHF-AB/FQ, CC/FQ, and CC/EE results for the electronic dynamic polarizability, with a frequency of  $1.966 \mu\text{m}^{-1}$ .

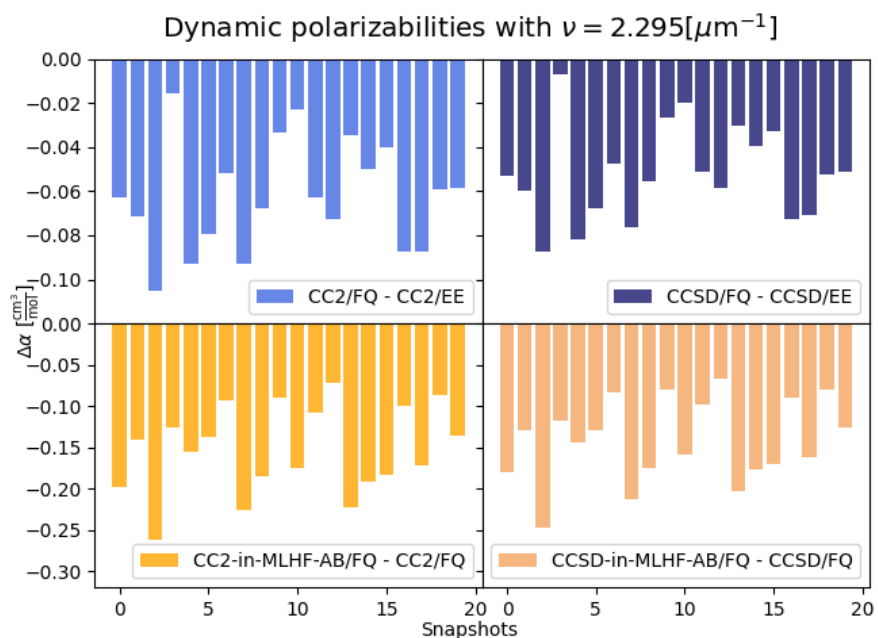

Figure S13: PhCN-in-THF snapshot-to-snapshot differences between CC-in-MLHF-AB/FQ, CC/FQ, and CC/EE results for the electronic dynamic polarizability, with a frequency of  $2.295 \mu\text{m}^{-1}$ .

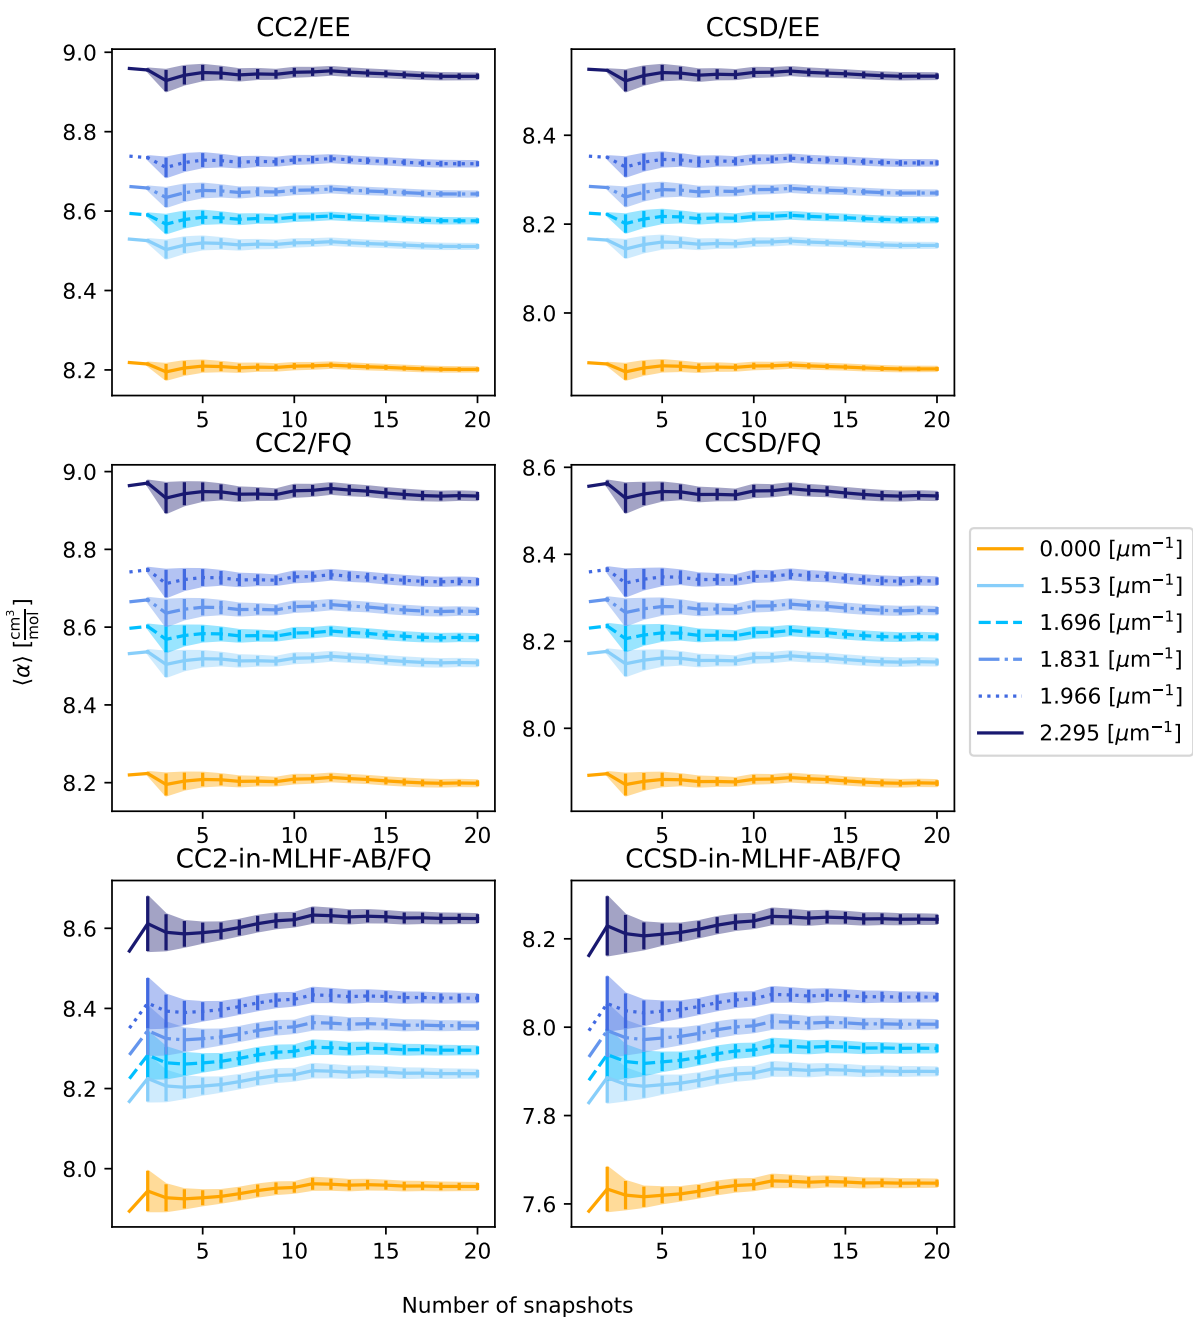

Figure S14: Electronic polarizability cumulative average of PhCN-in-ACN snapshots calculated at different frequencies as a function of the number of snapshots. Cumulative standard error bars at the 68% confidence interval are also plotted.

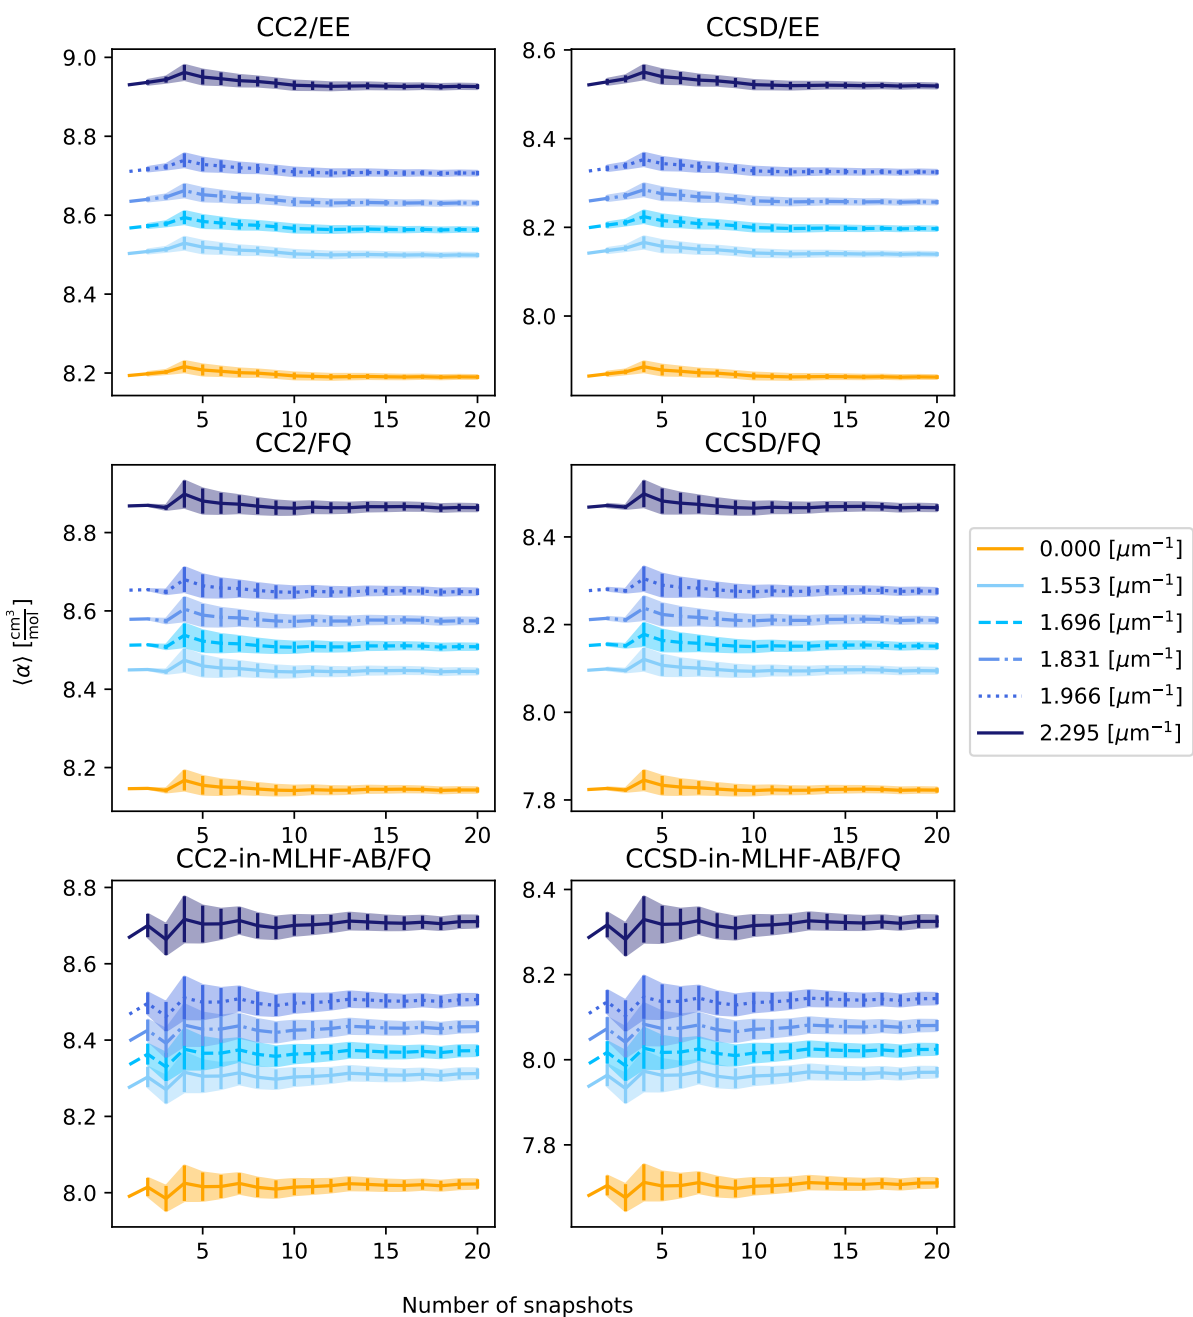

Figure S15: Electronic polarizability cumulative average of PhCN-in-THF snapshots calculated at different frequencies as a function of the number of snapshots. Cumulative standard error bars at the 68% confidence interval are also plotted.

## References

- (1) Alvarado, Y.; Labarca, P.; Cubillán, N.; Karam, A. Solvent effect on the electronic polarizability of benzonitrile. *Z. Naturforsch. A* **2003**, *58*, 68–74.
